# Supplementary material for: Neuroinflammation in neuronopathic Gaucher disease: Role of microglia and NK cells, biomarkers, and response to substrate reduction therapy
Source: PubMed Central journal article supplement (PMC9381039; doi:10.7554/elife.79830), 2022-08-16
Supplement: elife-79830-fig2-figsupp1-data3.pdf [file elife-79830-fig2-figsupp1-data3.pdf]

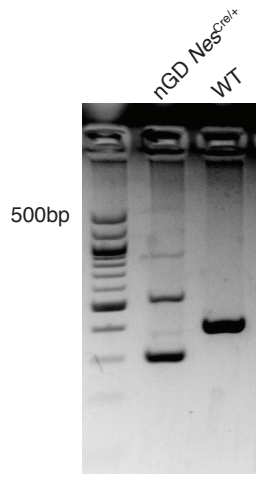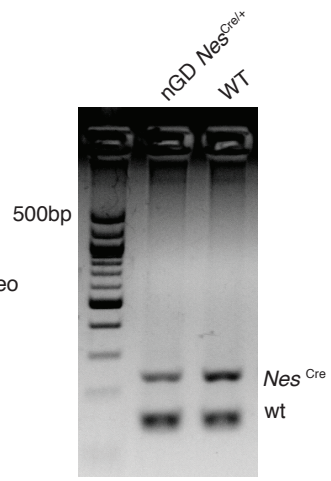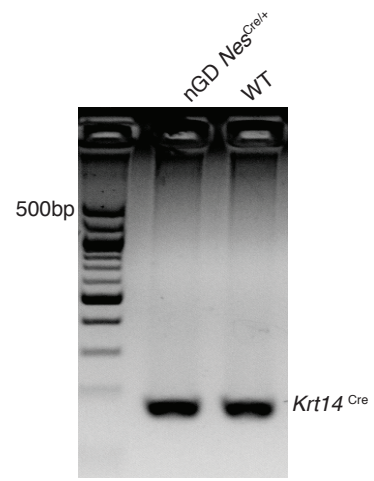

nGD Nes<sup>Cre/+</sup>
