# Supplementary material for: Neuroinflammation in neuronopathic Gaucher disease: Role of microglia and NK cells, biomarkers, and response to substrate reduction therapy
Source: eLife journal article supplement (doi:10.7554/elife.79830), 2022-07-13
Supplement: fig2-figsupp1-data5 [file elife-79830-fig2-figsupp1-data5-v1.pdf]

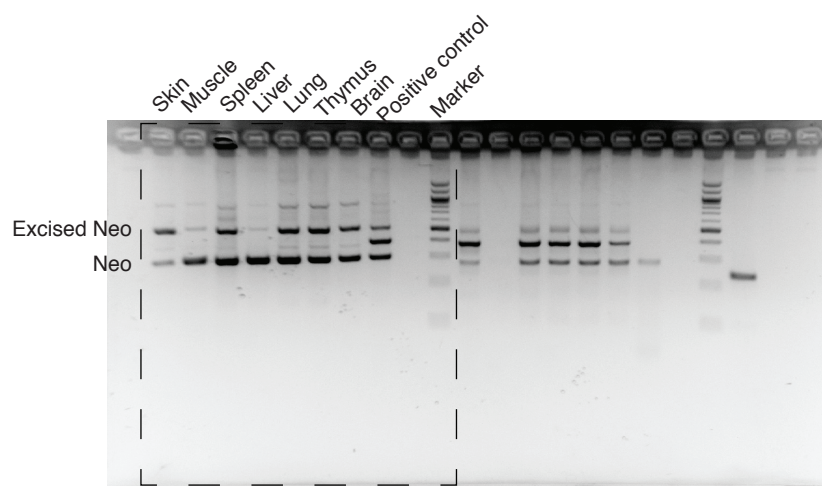

nGD *CX3Cr1*<sup>Cre/+</sup>
