# Supplementary material for: Neuroinflammation in neuronopathic Gaucher disease: Role of microglia and NK cells, biomarkers, and response to substrate reduction therapy
Source: eLife journal article supplement (doi:10.7554/elife.79830), 2022-07-13

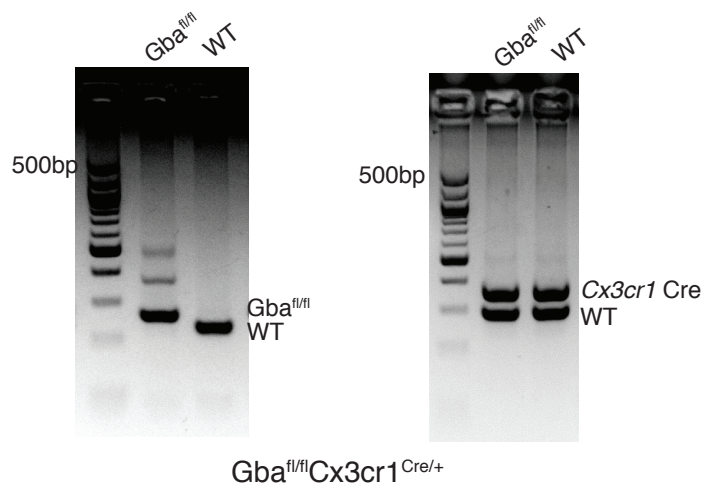

Supplement: fig3-figsupp1-data1 [file elife-79830-fig3-figsupp1-data1-v3.pdf]
